# Supplementary material for: Catalytic properties of RNA polymerases IV and V: accuracy, nucleotide incorporation and rNTP/dNTP discrimination
Source: PubMed Central journal article supplement — Nucleic Acids Res. 2017 Sep 5;45(19):11315–26. doi: 10.1093/nar/gkx794 (PMC5737373; doi:10.1093/nar/gkx794), 2017-09-05
Supplement: gkx794_supp.pdf [file gkx794_supp.pdf]

A. Positions of ultra-conserved amino acids that are different in Pol IV and V largest subunits, as detailed in Table S1.

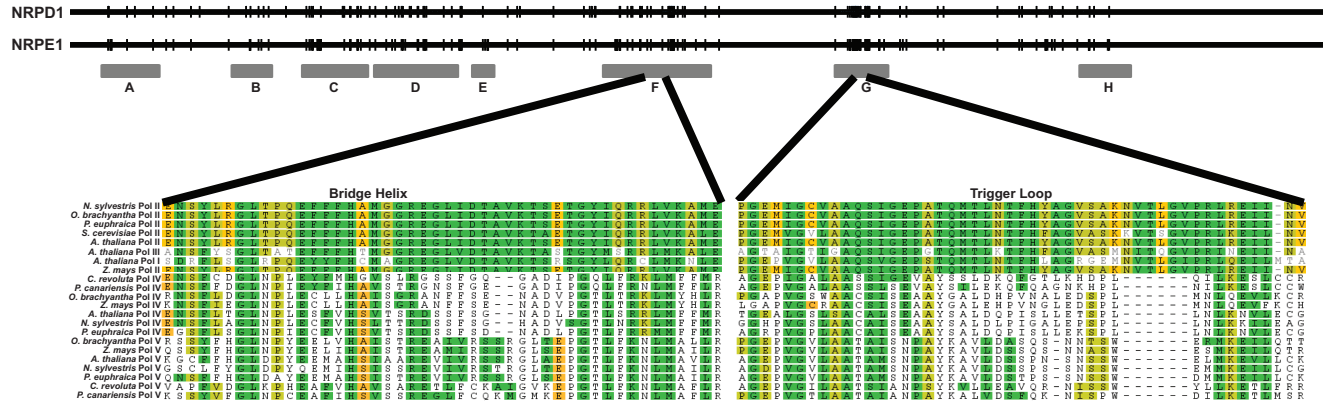

B. Positions of ultra-conserved amino acids that are different in the Pol IV/V second-largest subunit, as detailed in Table S1.

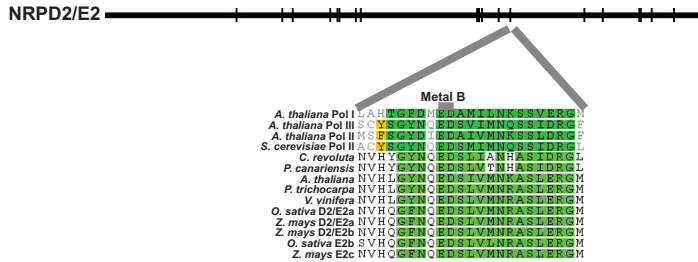

**Figure S1.** Pol IV and V have diverged at over 140 amino acid positions that are invariant in Pools I, II, and III and yeast Pol II (Table S1). (A) Divergent amino acids are depicted as vertical hash marks on a linear representation of the *S. cerevisiae* Rpb1 protein. Conserved RNA polymerase domains A through H are shown. Sequence alignments for bridge helix and trigger loop are highlighted. (B) Divergent amino acids of NRPD2/E2, common to Pol IV and Pol V, are mapped onto a linear depiction of the *S. cerevisiae* Rpb2 protein sequence. Location of the Metal B site of the catalytic center is shown.

### A. Replicate UTP incorporation experiments of Fig. 2

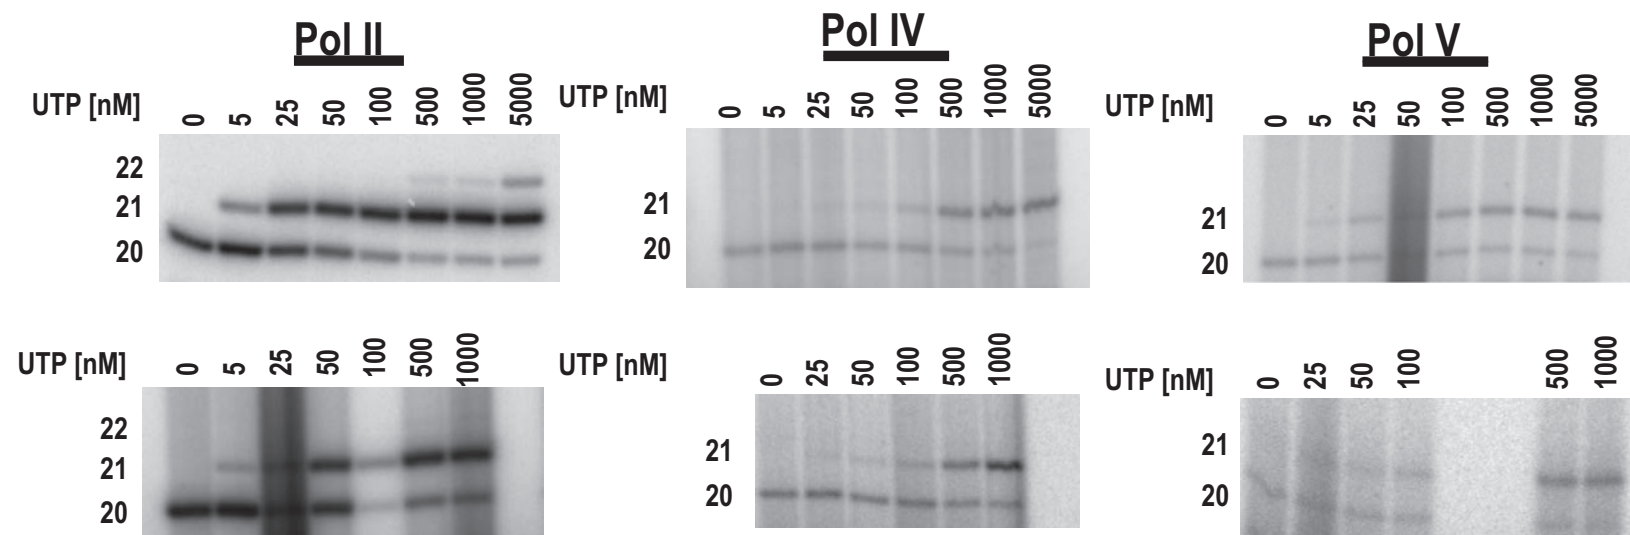

### B. Replicate ATP incorporation experiments of Fig. 2

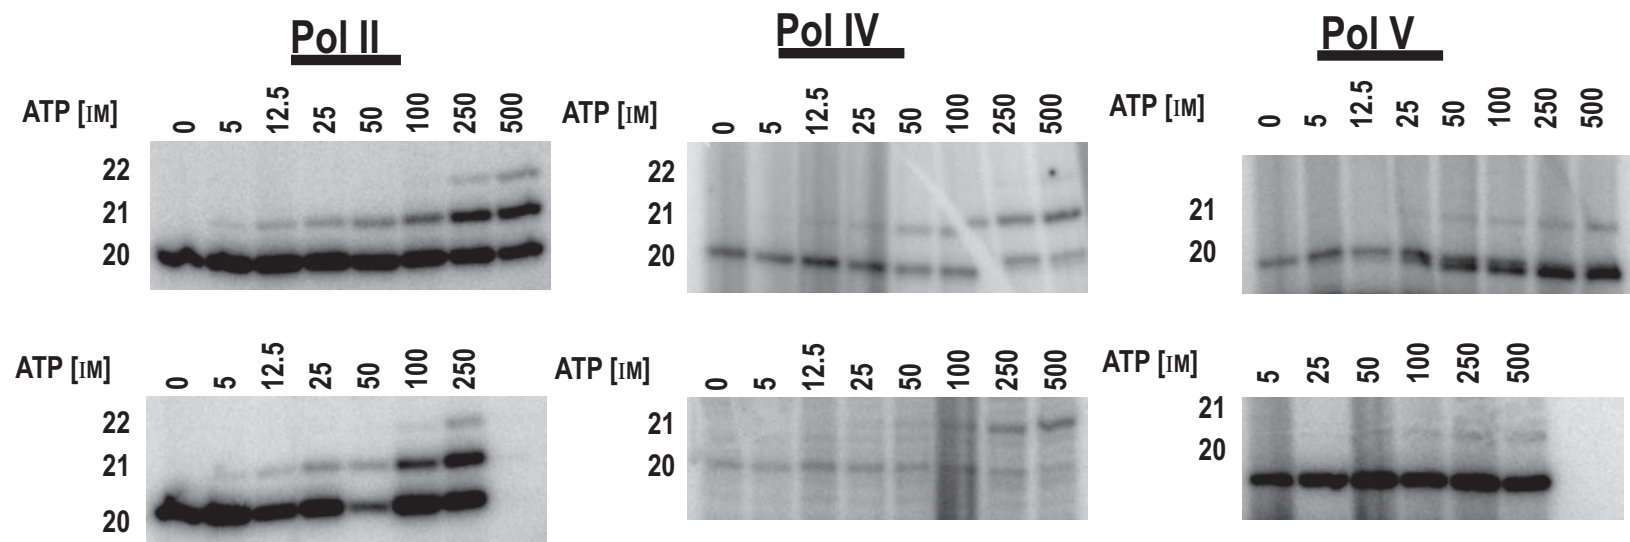

**Figure S2.** Data for complementary and non-complementary NTP kinetics calculations. (A) Replicate primer elongation experiments for calculating complementary (UTP) kinetics data for Pols II, IV, and V (Fig. 2). (B) Replicate primer elongation experiments for calculating non-complementary (ATP) kinetics data for Pols II, IV, and V (Fig. 2).

## A. Assay design

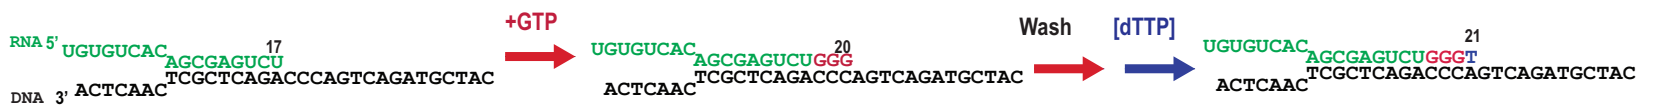

## B. dTTP incorporation replicate experiments

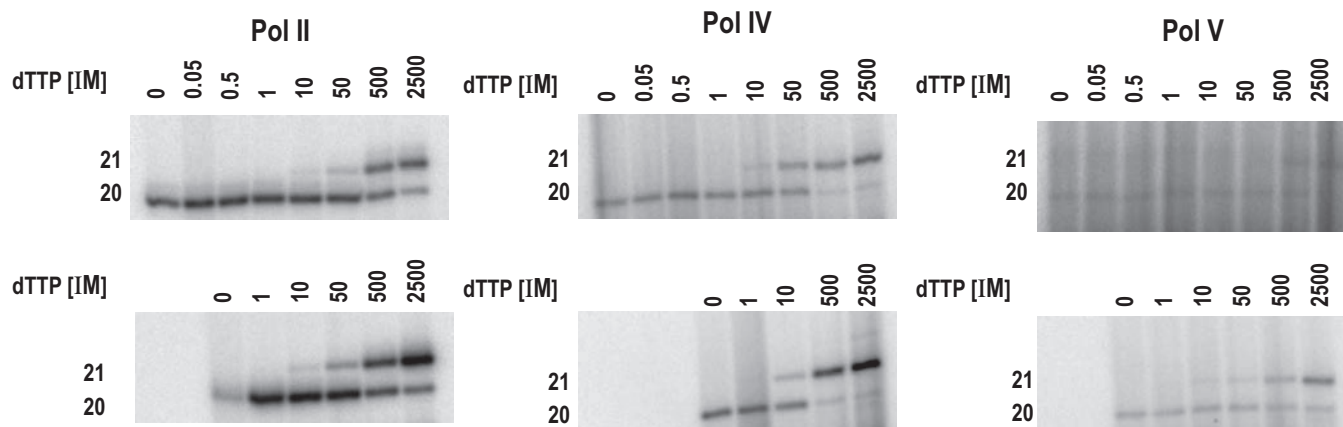

**Figure S3.** Differences in kinetics of dNTP incorporation contribute to differences in rNTP vs. dNTP discrimination of Pols IV and V relative to Pol II. (A) Primer elongation kinetics assays were used to determine the relative affinities of Pols II, IV, and V for dNTP versus rNTP. (B) Representative gels showing the incorporation of a complementary dNTP (dTTP) by Pols II, IV, and V across a range of dTTP concentrations. Incorporation of dTTP elongates the 20 nt RNA to 21 nts.

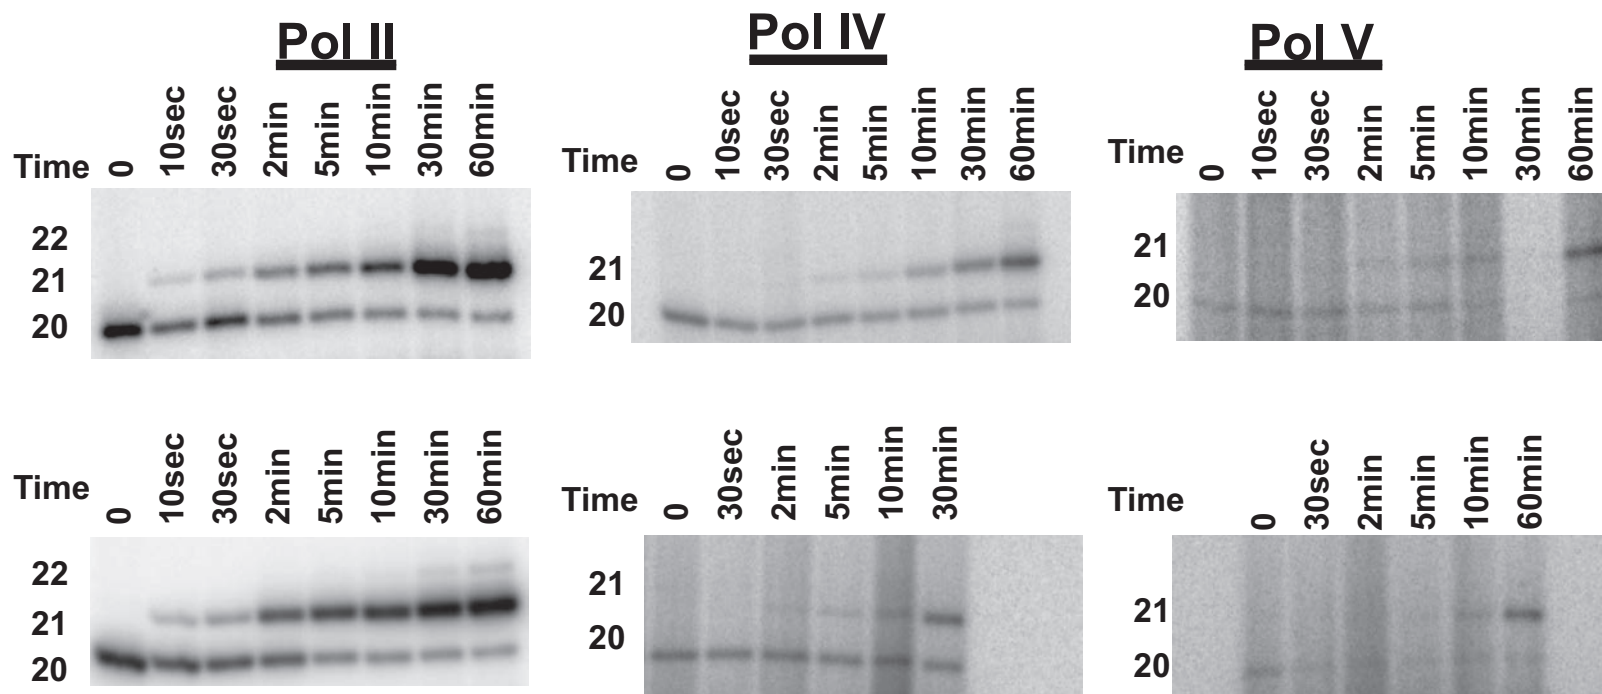

**Figure S4.** Replicate data for calculation of rate constants for Pols II, IV, and V shown in Figure 5 of the main figures.

**Table S1. Invariant amino acids of Arabidopsis Pol I, II, III and *S. cerevisiae* Pol II catalytic subunits that are different in Pols IV and V**

| yeast Rpb1 aa | NRPD1 (Pol IV) aa | yeast Rpb1 aa | NRPE1 (Pol V) aa | yeast Rpb2 aa | NRPD2/E2 (Pols IV & V) aa |
|---------------|-------------------|---------------|------------------|---------------|---------------------------|
| G52           | Q41               | G52           | Q42              | I269          | K266                      |
| L53           | V42               | D55           | N45              | H363          | G361                      |
| P78           | E68               | R57           | F47              | R384          | C378                      |
| P89           | S79               | P78           | E69              | L461          | F456                      |
| L114          | R104              | L114          | K105             | R476          | V471                      |
| K132          | deletion          | K132          | deletion         | S480          | V475                      |
| C142          | deletion          | C142          | deletion         | L514          | P509                      |
| G166          | deletion          | G166          | deletion         | P524          | F519                      |
| G178          | S143              | D218          | S191             | Q763          | H711                      |
| D218          | L207              | R247          | S219             | P765          | R713                      |
| P242          | T226              | P248          | V220             | N767          | V715                      |
| P248          | V232              | E259          | V232             | M773          | H722                      |
| E259          | F246              | T263          | R236             | R807          | L756                      |
| L266          | Y253              | N273          | V246             | S831          | L780                      |
| N273          | E260              | I325          | R292             | R983          | M917                      |
| Q297          | S267              | L329          | S296             | M1021         | Q955                      |
| I325          | A291              | K332          | W307             | R1096         | V1041                     |
| L329          | Q295              | G334          | E309             | V1099         | S1044                     |
| K332          | deletion          | L340          | F315             | G1121         | D1066                     |
| G334          | R307              | G342          | R317             | G1167         | K1112                     |
| V345          | S318              | R344          | G319             |               |                           |
| T375          | Q348              | V345          | S320             |               |                           |
| Y376          | V349              | P377          | E352             |               |                           |
| P377          | S350              | I385          | R360             |               |                           |
| I385          | K358              | D386          | G361             |               |                           |
| G395          | T368              | G395          | K370             |               |                           |
| P396          | L369              | P396          | L371             |               |                           |
| P400          | K373              | P400          | Y375             |               |                           |
| R412          | deletion          | R412          | deletion         |               |                           |
| R420          | I386              | R420          | S388             |               |                           |
| H435          | S400              | H435          | R403             |               |                           |
| Q447          | P412              | L443          | F411             |               |                           |
| K452          | Q417              | Q447          | P415             |               |                           |
| M456          | I421              | M456          | Q424             |               |                           |
| H458          | M423              | H458          | L426             |               |                           |
| T467          | V433              | K461          | Y429             |               |                           |
| R469          | S435              | Y478          | L446             |               |                           |
| N479          | R445              | N479          | S447             |               |                           |
| E486          | C452              | E486          | C454             |               |                           |
| N488          | H454              | N488          | H456             |               |                           |
| H490          | Y456              | H490          | F458             |               |                           |
| P514          | R480              | P514          | S482             |               |                           |
| D538          | N505              | Q525          | S493             |               |                           |
| T539          | C506              | T535          | deletion         |               |                           |
| P568          | A532              | R537          | E504             |               |                           |
| D602          | L561              | D538          | R505             |               |                           |
| G615          | F574              | T539          | V506             |               |                           |
| K619          | S578              | P568          | S532             |               |                           |
| G665          | S623              | L571          | A538             |               |                           |
| G707          | deletion          | G574          | V541             |               |                           |
| E715          | S697              | K575          | F542             |               |                           |
| V718          | A700              | D602          | G557             |               |                           |
| L722          | F704              | G615          | F570             |               |                           |
| N723          | K705              | G665          | S620             |               |                           |
| I756          | G738              | G707          | deletion         |               |                           |
| N757          | K739              | E715          | R654             |               |                           |
| Q767          | L749              | N723          | E660             |               |                           |
| G772          | A753              | G750          | K687             |               |                           |
| R774          | S755              | K752          | N689             |               |                           |
| L784          | T765              | G753          | S690             |               |                           |
| P785          | C766              | I756          | T693             |               |                           |
| F787          | A768              | N757          | K694             |               |                           |
| P794          | Y790              | Q767          | L704             |               |                           |
| F799          | V795              | R774          | F712             |               |                           |
| F815          | V811              | L784          | A722             |               |                           |
| G823          | S819              | P785          | I723             |               |                           |
| L824          | S820              | P794          | S735             |               |                           |
| I825          | F821              | F799          | I740             |               |                           |
| D826          | S822              | F815          | A756             |               |                           |

|       |          |       |          |
|-------|----------|-------|----------|
| T827  | G823     | G823  | V764     |
| A828  | deletion | D826  | R767     |
| V829  | deletion | T827  | S768     |
| K830  | N824     | A828  | S769     |
| T831  | A825     | V829  | R770     |
| Y836  | T830     | K830  | G771     |
| K843  | F837     | T831  | L772     |
| E846  | R840     | Y836  | T777     |
| D874  | deletion | K843  | A784     |
| F893  | deletion | E846  | R787     |
| F1053 | deletion | G861  | S802     |
| Q1070 | C883     | D874  | R816     |
| G1073 | S886     | F893  | deletion |
| P1075 | A888     | F1053 | G817     |
| T1077 | Y890     | Q1070 | T834     |
| Q1078 | S891     | G1073 | S837     |
| M1079 | A892     | E1074 | N838     |
| T1080 | L893     | T1077 | Y841     |
| L1081 | D894     | Q1078 | K842     |
| N1082 | Q895     | M1079 | A843     |
| T1083 | P896     | T1080 | V844     |
| H1085 | S898     | N1082 | D846     |
| A1087 | L900     | T1083 | S847     |
| G1088 | E901     | H1085 | P849     |
| V1094 | deletion | A1087 | deletion |
| T1095 | deletion | G1088 | S851     |
| G1097 | deletion | V1094 | deletion |
| V1098 | deletion | T1095 | deletion |
| P1099 | L906     | G1097 | deletion |
| R1100 | N907     | V1098 | deletion |
| T1113 | S926     | P1099 | E856     |
| P1114 | L927     | R1100 | L857     |
| T1142 | S955     | T1113 | I878     |
| E1151 | M964     | P1114 | L879     |
| R1194 | H983     | L1120 | H885     |
| M1202 | K994     | T1142 | S907     |
| V1276 | D1079    | V1146 | T911     |
| L1306 | deletion | E1151 | L916     |
| G1310 | deletion | R1194 | 938      |
| N1330 | D1145    | M1202 | W949     |
| L1348 | F1163    | V1276 | D1040    |
| E1351 | N1166    | L1306 | deletion |
| R1366 | E1181    | G1310 | deletion |
| R1386 | A1201    | N1330 | Y1110    |
| E1403 | S1223    | E1342 | S1122    |
| L1409 | F1229    | A1343 | C1123    |
| L1430 | A1249    | R1345 | F1125    |
|       |          | E1351 | R1131    |
|       |          | V1355 | S1135    |
|       |          | R1366 | E1146    |
|       |          | R1386 | S1166    |
|       |          | F1402 | L1187    |
|       |          | E1403 | I1188    |
|       |          | L1409 | F1194    |
|       |          | V1428 | C1213    |
|       |          | L1430 | S1214    |

**Table S2. Oligonucleotides used in primer elongation assays**

| <b>Oligonucleotide Name</b>                 | <b>Oligonucleotide Sequence (5'--&gt;3')</b>    |
|---------------------------------------------|-------------------------------------------------|
| RNA primer                                  | UGUGUCACAGCGAGUCU                               |
| GTP incorp. fidelity DNA template           | CATCGTAGACTGACCCAGACTCGCTCAACTCA                |
| CTP incorp. fidelity DNA template           | CATCGTAGACTTAGGGAGACTCGCTCAACTCA                |
| UTP incorp. fidelity DNA template           | CATCGTAGACTGGAAAAGACTCGCTCAACTCA                |
| ATP incorp. fidelity DNA template           | CATCGTAGACTGATTTAGACTCGCTCAACTCA                |
| UTP incorp. fidelity, methylated template   | CATCGTAGACTG <sup>me</sup> CAAAAGACTCGCTCAACTCA |
| ATP incorp. fidelity, methylated template   | CATCGTAGACTG <sup>me</sup> CTTTAGACTCGCTCAACTCA |
| UTP incorp. fidelity, unmethylated template | CATCGTAGACTGCAAAAGACTCGCTCAACTCA                |
| ATP incorp. fidelity, unmethylated template | CATCGTAGACTGCTTTAGACTCGCTCAACTCA                |
| CTP incorp. fidelity, methylated template   | CATCGTAGACTT <sup>me</sup> CGGGAGACTCGCTCAACTCA |
| CTP incorp. fidelity, unmethylated template | CATCGTAGACTTCGGGAGACTCGCTCAACTCA                |
